# Supplementary material for: IGFBP2 expression predicts IDH-mutant glioma patient survival
Source: PubMed Central journal article supplement (PMC5352106; doi:10.18632/oncotarget.13329), 2016-11-12
Supplement: oncotarget-08-191-s002.pdf [file oncotarget-08-191-s002.pdf]

## **IGFBP2 expression predicts IDH-mutant glioma patient survival**

### **Supplementary Material**

**Supplementary Table 1: Mutation Frequencies in Lower-grade Glioma**

| <b>Gene</b>   | <b>IDH Wildtype</b> | <b>IDH Mutant</b> |
|---------------|---------------------|-------------------|
| <i>NF1</i>    | 21%                 | 3%                |
| <i>PIK3CA</i> | 9%                  | 8%                |
| <i>PIK3R1</i> | 2%                  | 6%                |
| <i>PTEN</i>   | 25%                 | 0%                |
| <i>RB1</i>    | 5%                  | 0%                |
| <i>TP53</i>   | 15%                 | 59%               |

**Supplementary Table 2: Overall Survival of Lower-grade Glioma Patients**

| <b>Gene</b>             | <b>Median Survival (months)</b> | <b>p value</b> | <b>Hazard Ratio (A/B)</b> | <b>95% CI of Ratio</b> |
|-------------------------|---------------------------------|----------------|---------------------------|------------------------|
| <b>AKT2&lt;0</b>        | 87.39                           | 0.0015         | 0.46                      | 0.2522 to 0.8437       |
| <b>AKT2&gt;0</b>        | 43.86                           |                |                           |                        |
| <b>ARAF&lt;0</b>        | 94.45                           | 0.0039         | 0.52                      | 0.3179 to 0.8569       |
| <b>ARAF&gt;0</b>        | 52.07                           |                |                           |                        |
| <b>E2F2&lt;0</b>        | 79.93                           | 0.0255         | 0.58                      | 0.3384 to 1.003        |
| <b>E2F2&gt;0</b>        | 48.98                           |                |                           |                        |
| <b>ERBB2&lt;0</b>       | 79.93                           | <0.0001        | 0.29                      | 0.1622 to 0.5018       |
| <b>ERBB2&gt;0</b>       | 26.74                           |                |                           |                        |
| <b>ERBB3&lt;0</b>       | 57.88                           | 0.0022         | 2.07                      | 1.243 to 3.454         |
| <b>ERBB3&gt;0</b>       | 87.39                           |                |                           |                        |
| <b>ERBB3-Y1289&lt;0</b> | 65.70                           | 0.0144         | 1.82                      | 1.117 to 2.967         |
| <b>ERBB3-Y1289&gt;0</b> | 79.93                           |                |                           |                        |
| <b>FGFR3&lt;0</b>       | 79.93                           | 0.0047         | 0.51                      | 0.2858 to 0.9024       |
| <b>FGFR3&gt;0</b>       | 41.46                           |                |                           |                        |
| <b>FOXM1&lt;0</b>       | 87.39                           | 0.0001         | 0.41                      | 0.2527 to 0.6703       |
| <b>FOXM1&gt;0</b>       | 50.10                           |                |                           |                        |
| <b>IGFBP2&lt;0</b>      | 87.39                           | <0.0001        | 0.11                      | 0.0464 to 0.2624       |
| <b>IGFBP2&gt;0</b>      | 17.67                           |                |                           |                        |
| <b>IGFBP2&lt;0</b>      | 94.45                           | <0.0001        | 0.32                      | 0.1876 to 0.5314       |
| <b>IGFBP2&gt;0</b>      | 41.46                           |                |                           |                        |
| <b>IDH</b>              | 19.88                           | <0.0001        | 7.20                      | 3.153 to 16.42         |
| <b>IDHm</b>             | 87.39                           |                |                           |                        |
| <b>IDH-IGFBP2&lt;0</b>  | Undefined                       | 0.0308         | 0.24                      | 0.1021 to 0.5676       |
| <b>IDH-IGFBP2&gt;0</b>  | 18.36                           |                |                           |                        |
| <b>IDHm-IGFBP2&lt;0</b> | 87.39                           | <0.0001        | 0.05                      | 0.0009576 to 3.058     |
| <b>IDHm-IGFBP2&gt;0</b> | 14.98                           |                |                           |                        |
| <b>IDHm-IGFBP2&lt;0</b> | 95.50                           | 0.0040         | 0.42                      | 0.2077 to 0.857        |
| <b>IDHm-IGFBP2&gt;0</b> | 61.96                           |                |                           |                        |

|                      |        |        |      |                     |
|----------------------|--------|--------|------|---------------------|
| <b>IDH-PTEN&lt;0</b> | 18.36  | 0.0121 | 3.71 | 1.676 to<br>8.208   |
| <b>IDH-PTEN&gt;0</b> | 133.60 |        |      |                     |
| <b>MYC&lt;0</b>      | 67.41  | 0.0014 | 2.05 | 1.276 to<br>3.286   |
| <b>MYC&gt;0</b>      | 79.93  |        |      |                     |
| <b>NF1&lt;0</b>      | 48.98  | 0.0051 | 1.89 | 1.125 to<br>3.168   |
| <b>NF1&gt;0</b>      | 79.93  |        |      |                     |
| <b>PTEN&lt;0</b>     | 62.91  | 0.0032 | 1.89 | 1.191 to<br>3.006   |
| <b>PTEN&gt;0</b>     | 94.45  |        |      |                     |
| <b>PIK3R1&lt;0</b>   | 61.96  | 0.0006 | 2.24 | 1.405 to<br>3.562   |
| <b>PIK3R1&gt;0</b>   | 94.45  |        |      |                     |
| <b>RB1&lt;0</b>      | 134.20 | 0.0482 | 0.61 | 0.3849 to<br>0.9776 |
| <b>RB1&gt;0</b>      | 67.41  |        |      |                     |
| <b>WWTR1&lt;0</b>    | 79.93  | 0.0023 | 0.50 | 0.3034 to<br>0.8095 |
| <b>WWTR1&gt;0</b>    | 62.91  |        |      |                     |
| <b>WWTR1&lt;0</b>    | 87.39  | 0.0241 | 0.59 | 0.3736 to<br>0.9448 |
| <b>WWTR1&gt;0</b>    | 65.70  |        |      |                     |

Comparison of RNA expression (genes in *italic* typeface), protein abundance and phosphorylation (roman typeface) between z-scores less than zero and greater than zero of individual genes. IDH, IDH-wildtype glioma patients; IDHm, IDH-mutant glioma patients.

**Supplementary Table 3: Disease-free Survival of Lower-grade Glioma Patients**

| <b>Gene</b>            | <b>Median Survival (months)</b> | <b><i>p</i> value</b> | <b>Hazard Ratio (A/B)</b> | <b>95% CI of Ratio</b> |
|------------------------|---------------------------------|-----------------------|---------------------------|------------------------|
| <i>AKT2</i> <0         | 53.45                           | 0.0010                | 0.48                      | 0.2687 to 0.8425       |
| <i>AKT2</i> >0         | 29.66                           |                       |                           |                        |
| <i>ERBB2</i> <0        | 53.45                           | 0.0004                | 0.46                      | 0.2683 to 0.7877       |
| <i>ERBB2</i> >0        | 34.00                           |                       |                           |                        |
| ERBB3<0                | 34.00                           | 0.0019                | 1.92                      | 1.231 to 2.981         |
| ERBB3>0                | 61.96                           |                       |                           |                        |
| ERBB3-Y1289<0          | 39.32                           | 0.0282                | 1.59                      | 1.036 to 2.426         |
| ERBB3-Y1289>0          | 63.83                           |                       |                           |                        |
| IDH                    | 13.30                           | <0.0001               | 5.51                      | 2.435 to 12.49         |
| IDHm                   | 53.52                           |                       |                           |                        |
| IDH- <i>IGFBP2</i> <0  | 37.68                           | 0.0273                | 0.29                      | 0.1259 to 0.6626       |
| IDH- <i>IGFBP2</i> >0  | 9.43                            |                       |                           |                        |
| IDHm- <i>IGFBP2</i> <0 | 61.96                           | 0.0068                | 0.18                      | 0.006998 to 4.582      |
| IDHm- <i>IGFBP2</i> >0 | 29.66                           |                       |                           |                        |
| <i>IGFBP2</i> <0       | 53.52                           | <0.0001               | 0.14                      | 0.05582 to 0.3605      |
| <i>IGFBP2</i> >0       | 9.43                            |                       |                           |                        |
| IGFBP2<0               | 68.89                           | <0.0001               | 0.44                      | 0.2806 to 0.6963       |
| IGFBP2>0               | 37.91                           |                       |                           |                        |
| <i>PIK3R1</i> <0       | 37.91                           | 0.0441                | 1.52                      | 1 to 2.299             |
| <i>PIK3R1</i> >0       | 53.52                           |                       |                           |                        |
| <i>WWTR1</i> <0        | 13.30                           | 0.0071                | 0.57                      | 0.3613 to 0.8952       |
| <i>WWTR1</i> >0        | 53.52                           |                       |                           |                        |

Comparison of RNA expression (in *italic* typeface), protein abundance and phosphorylation (in roman typeface) between z-scores less than zero and greater than zero of individual genes. IDH, IDH-wildtype glioma patients; IDHm, IDH-mutant glioma patients.
